# Supplementary material for: Medication Adherence and Its Associated Factors among Patients with Type 2 Diabetes Mellitus Attending Primary Health Centers of Eastern Province, Saudi Arabia
Source: MDPI journal article supplement (doi:10.3390/medicina59050989), 2023-05-20
Supplement: s1 [file s1]

الالتزام بالأدوية بين مرضى السكر المسجلين بمختلف المراكز الصحية الأولية بحفر الباطن بالمملكة العربية السعودية

| البيانات الاجتماعية الديموغرافية:                                                                                                          |                                                                                    |
|--------------------------------------------------------------------------------------------------------------------------------------------|------------------------------------------------------------------------------------|
| 1- العمر                                                                                                                                   |                                                                                    |
| 2- الجنس                                                                                                                                   | 1- ذكر 2- أنثى                                                                     |
| 3- محل السكن                                                                                                                               | 1- حضر 2- ريف                                                                      |
| 4- المستوى التعليمي                                                                                                                        | 1- أمي / يقرأ ويكتب<br>2- ابتدائي / اعدادي / ثانوي<br>3- الجامعة / الدراسات العليا |
| 5- الوظيفة                                                                                                                                 | 1- موظف في قطاع حكومي<br>2- موظف في قطاع خاص<br>3- لا يعمل<br>4- متقاعد            |
| 6- الحالة الاجتماعية                                                                                                                       | 1- متزوج 2- مطلق / أرمل 3- أعزب                                                    |
| 7- الدخل الشهري                                                                                                                            | 1- أقل من 5000 ريال<br>2- 5000-7000 ريال<br>3- أكثر من 7000 ريال                   |
| 8- هل تدخن ؟ (بما في ذلك الشيعة)                                                                                                           | 1. نعم - يوميًا<br>2. نعم - نادرًا<br>3. لا                                        |
| 9- هل لديك امراض مزمنة أخرى؟                                                                                                               | 1- نعم 2- لا                                                                       |
| 10- كم سنة مكتملة منذ تشخيص إصابتك بمرض السكري (حدد السنة)                                                                                 |                                                                                    |
| تقييم الالتزام بالأدوية                                                                                                                    |                                                                                    |
| 1- هل تنسى أحيانًا تناول أدويةك                                                                                                            | 1. نعم<br>2. لا                                                                    |
| 2- يفقد الناس أحيانًا تناول أدويتهم لأسباب أخرى غير النسيان. بالتفكير خلال الأسبوعين الماضيين، هل كانت هناك أي أيام لم تتناول فيها أدويةك؟ | 1. نعم<br>2. لا                                                                    |
| 3- هل سبق لك أن توقفت عن تناول أدويةك دون إخبار طبيبك، لأنك شعرت بسوء عندما تناولتها؟                                                      | 1. نعم<br>2. لا                                                                    |
| 4- عندما تسافر أو تغادر المنزل، هل تنسى أحيانًا إحضار أدويةك؟                                                                              | 1. نعم<br>2. لا                                                                    |
| 5- هل تناولت أدويةك أمس؟                                                                                                                   | 1. نعم<br>2. لا                                                                    |
| 6- عندما تشعر بأن حالتك الصحية تحت السيطرة، هل تتوقف أحيانًا عن تناول الأدوية؟                                                             | 1. نعم<br>2. لا                                                                    |
| 7- يعتبر تناول الأدوية يوميًا مصدر إزعاج حقيقي لبعض الأشخاص. هل شعرت يومًا بالإرهاق حيال الالتزام بخطة العلاج الخاصة بك؟                   | 1. نعم<br>2. لا                                                                    |

|                                                                                                        |                                                                       |
|--------------------------------------------------------------------------------------------------------|-----------------------------------------------------------------------|
| 8- كم مرة تجد صعوبة في تذكر تناول جميع أدويةك؟                                                         | 1. أوافق بشدة<br>2. توافق<br>3. محايد<br>4. لا أوافق<br>5. أعارض بشدة |
| <b>مقياس تصور المرض: قيم تصوراتك تجاه المرض للسؤال أدناه. (0 هو الأدنى و 10 هو الأعلى)</b>             |                                                                       |
| 1- ما مدى تأثير مرضك على حياتك؟                                                                        | 10 9 8 7 6 5 4 3 2 1 0                                                |
| 2- إلى متى تعتقد أن مرضك سيستمر؟                                                                       | 10 9 8 7 6 5 4 3 2 1 0                                                |
| 3- ما مدى سيطرة شعورك على مرضك؟                                                                        | 10 9 8 7 6 5 4 3 2 1 0                                                |
| 4- إلى أي مدى تعتقد أن علاجك يمكن أن يساعد في مرضك؟                                                    | 10 9 8 7 6 5 4 3 2 1 0                                                |
| 5- ما مدى شعورك بأعراض مرضك؟                                                                           | 10 9 8 7 6 5 4 3 2 1 0                                                |
| 6- ما مدى قلقك بشأن مرضك؟                                                                              | 10 9 8 7 6 5 4 3 2 1 0                                                |
| 7- إلى أي مدى تشعر أنك تفهم مرضك؟                                                                      | 10 9 8 7 6 5 4 3 2 1 0                                                |
| 8- ما مدى تأثير مرضك عليك عاطفياً؟ (على سبيل المثال ، هل تجعلك غاضباً أم خائفاً أو منزعجاً أو مكتئباً؟ | 10 9 8 7 6 5 4 3 2 1 0                                                |
| <b>أسئلة معرفة مرض السكري</b>                                                                          |                                                                       |
| 1- استهلاك المزيد من السكر والأطباق الحلوة الأخرى هو سبب لمرض السكري.                                  | 1. نعم<br>2. لا<br>3. لست متأكداً                                     |
| 2- إذا كنت مصاباً بالسكري ، فإن أطفالهم لديهم فرصة أكبر للإصابة بمرض السكري.                           | 1. نعم<br>2. لا<br>3. لست متأكداً                                     |
| 3- يمكن علاج مرض السكري                                                                                | 1. نعم<br>2. لا<br>3. لست متأكداً                                     |
| 4- مستوى السكر في الدم الصائم 200 مرتفع للغاية.                                                        | 1. نعم<br>2. لا<br>3. لست متأكداً                                     |
| 5- ستزيد ممارسة التمارين الرياضية بانتظام من الحاجة إلى الأنسولين أو أدوية السكري الأخرى               | 1. نعم<br>2. لا<br>3. لست متأكداً                                     |
| 6- سيكون من الصعب إدارة حالة مرض السكري لدي ، إذا كنت أنام أقل من 7 ساعات يومياً بانتظام               | 1. نعم<br>2. لا<br>3. لست متأكداً                                     |
| 7- تتعافى الجروح والجروح على مرضى السكري غير المتحكم فيه بشكل أبطأ.                                    | 1. نعم<br>2. لا<br>3. لست متأكداً                                     |
| 8- الدواء أهم من النظام الغذائي وممارسة الرياضة للسيطرة على مرض السكري لدي                             | 1. نعم<br>2. لا<br>3. لست متأكداً                                     |
| 9- يجب على الشخص المصاب بداء السكري تطهير الجرح باليود والكحول.                                        | 1. نعم<br>2. لا<br>3. لست متأكداً                                     |

|                                    |                                  |
|------------------------------------|----------------------------------|
| 10- مرض السكري يمكن أن يضر بكليتي. | 1. نعم<br>2. لا<br>3. لست متأكدا |
|------------------------------------|----------------------------------|

### **English Version of the data collection form**

#### **Adherence to medicines among diabetes patients enrolled in various primary health centers in Hafr Al Batin, Saudi Arabia**

| <b>Sociodemographic data:</b>                                                         |                                                                                                        |
|---------------------------------------------------------------------------------------|--------------------------------------------------------------------------------------------------------|
| 1- Age (Specify completed years)                                                      |                                                                                                        |
| 2- Sex                                                                                | 1. Male<br>2. Female                                                                                   |
| 3- Educational level                                                                  | 1. Up to high school<br>2. University / Graduate Studies                                               |
| 4- Occupation                                                                         | 1. Employee in a government sector<br>2. Employee in the private sector<br>3. Unemployed<br>4. Retired |
| 5- Marital status                                                                     | 1. Married<br>2. Divorced / Widowed<br>3. Single                                                       |
| 6- Residence                                                                          | 1. Rural<br>2. City                                                                                    |
| 7- Monthly income                                                                     | 1. Less than 5000 riyals<br>2. 5000-7000 SAR<br>3. More than 7000 riyals                               |
| 8- Do you smoke ? (including shisha)                                                  | 1- Yes – Daily<br>2- Yes – Rarely<br>3- No                                                             |
| 9- Do you have other chronic diseases such as hypertension, heart disease etc ?       | 1. Yes<br>2. No                                                                                        |
| 10- How many years completed since you are diagnosed with diabetes (Specify the year) |                                                                                                        |
| <b>Medication adherence assessment</b>                                                |                                                                                                        |
| 1- Several times I forget to take my antidiabetic medications                         | 1. Yes<br>2. No                                                                                        |

|                                                                                                                                |                                                                                    |
|--------------------------------------------------------------------------------------------------------------------------------|------------------------------------------------------------------------------------|
| 2- Are you careless at times about taking your antidiabetic medication?                                                        | 1. Yes<br>2. No                                                                    |
| 3- When you feel better, do you sometimes stop taking your antidiabetic medication?                                            | 1. Yes<br>2. No                                                                    |
| 4- When you travel or leave home, do you sometimes forget to bring your medicines?                                             | 1. Yes<br>2. No                                                                    |
| 5- Did you take your medications yesterday?                                                                                    | 1. Yes<br>2. No                                                                    |
| 6- In the past month, have you did not take the prescribed doses?                                                              | 1. Yes<br>2. No                                                                    |
| 7- Have you ever felt overwhelmed by sticking to your treatment plan as it might have created nuisance to you?                 | 1. Yes<br>2. No                                                                    |
| 8- I know better than the doctors when to stop taking medication.                                                              | 1. Strongly agree<br>2. Agree<br>3. Neutral<br>4. Disagree<br>5. Strongly disagree |
| <b>Disease perception</b> scale: Rate your perceptions towards illness for the below question. (0 is lowest and 10 is highest) |                                                                                    |
| 1- How much does your illness (diabetes) affect your life?                                                                     | 0 1 2 3 4 5 6 7 8 9 10                                                             |
| 2- What do you recognize that how long your diabetes will last?                                                                | 0 1 2 3 4 5 6 7 8 9 10                                                             |
| 3- How much control does your feeling take over your illness (diabetes)?                                                       | 0 1 2 3 4 5 6 7 8 9 10                                                             |
| 4- What is your perception of the prescribed treatment that can help to control your illness?                                  | 0 1 2 3 4 5 6 7 8 9 10                                                             |
| 5- How much do you suffer with the symptoms of your illness?                                                                   | 0 1 2 3 4 5 6 7 8 9 10                                                             |
| 6- How much are you nervous about your illness?                                                                                | 0 1 2 3 4 5 6 7 8 9 10                                                             |
| 7- To what extent do you feel you understand your illness?                                                                     | 0 1 2 3 4 5 6 7 8 9 10                                                             |
| 8- How much does your illness affect you psychologically? (For example, does it make you angry, scared, upset, or depressed?   | 0 1 2 3 4 5 6 7 8 9 10                                                             |
| <b>Diabetes Knowledge Questions</b>                                                                                            |                                                                                    |

|                                                                                                |                                |
|------------------------------------------------------------------------------------------------|--------------------------------|
| 1- Consuming more sugar and other sweet dishes is a cause of diabetes.                         | 1. Yes<br>2. No<br>3. Not sure |
| 2- If I am diabetic, my kids have a higher chance of developing diabetic.                      | 1. Yes<br>2. No<br>3. Not sure |
| 3- Diabetes can be cured                                                                       | 1. Yes<br>2. No<br>3. Not sure |
| 4- A fasting blood sugar level of 200 is too high.                                             | 1. Yes<br>2. No<br>3. Not sure |
| 5- Regular exercise will increase the need for insulin or other diabetic medication            | 1. Yes<br>2. No<br>3. Not sure |
| 6- My diabetes status will be harder to manage, if I sleep less than 7 hours per day regularly | 1. Yes<br>2. No<br>3. Not sure |
| 7- Cuts and abrasions on patients with uncontrolled diabetes heal more slowly.                 | 1. Yes<br>2. No<br>3. Not sure |
| 8- Medication is more important than diet and exercise to control my diabetes                  | 1. Yes<br>2. No<br>3. Not sure |
| 9- A person with diabetes should cleanse a cut with iodine and alcohol.                        | 1. Yes<br>2. No<br>3. Not sure |
| 10- Diabetes can damage my kidneys.                                                            | 1. Yes<br>2. No<br>3. Not sure |
